# Supplementary material for: Beamspace ESPRIT for mmWave Channel Sensing: Performance Analysis and Beamformer Design
Source: Frontiers journal article supplement (doi:10.3389/frsip.2021.820617), 2022-02-11
Supplement: Presentation_1.pdf [file Presentation_1.pdf]

## I. APPENDIX

## A. Proof of Auxiliary Lemmas for Theorem 1

Our proof follows similar arguments as [1] with necessary modifications for beamspace and multi-snapshot scenario. For completeness, we provide all auxiliary lemmas used.

## Preliminaries

Let  $\mathbf{S}_1, \mathbf{S}_2$  be any orthonormal bases for  $\mathcal{R}(\mathbf{U}_y)$  and  $\mathcal{R}(\widehat{\mathbf{U}}_y)$ , respectively. The principal (or canonical) angles between the subspaces  $\mathcal{R}(\mathbf{U}_y)$  and  $\mathcal{R}(\widehat{\mathbf{U}}_y)$  are defined as the  $\Theta(\mathbf{S}_1, \mathbf{S}_2) := [\omega_1, \omega_2, \dots, \omega_S]^T$  where  $\omega_k \in [0, \pi/2]$  satisfies:

$$\cos(\omega_i) = \sigma_i(\mathbf{S}_1^H \mathbf{S}_2) \quad (48)$$

We consider the SVD of  $\mathbf{S}_1^H \mathbf{S}_2 = \widetilde{\mathbf{U}} \widetilde{\boldsymbol{\Sigma}} \widetilde{\mathbf{V}}^H$ . Since ESPRIT is invariant to the exact choice of the basis, for our analysis we will consider the orthonormal bases for  $\mathcal{R}(\mathbf{U}_y)$  and  $\mathcal{R}(\widehat{\mathbf{U}}_y)$  as  $\mathbf{U}_y = \mathbf{S}_1 \widetilde{\mathbf{U}}$ , and  $\widehat{\mathbf{U}}_y = \mathbf{S}_2 \widetilde{\mathbf{V}}$ . In this case, it can be verified that the principal angles defined in (48) can be written as:

$$\cos(\omega_i) = |\mathbf{u}_i^H \widehat{\mathbf{u}}_i|$$

Here we assumed that the singular vectors are ordered such that  $\omega_1 \geq \omega_2 \geq \dots \geq \omega_S$ . We also denote

$$\sin(\Theta(\mathbf{U}_y, \widehat{\mathbf{U}}_y)) := [\sin(\omega_1), \sin(\omega_2), \dots, \sin(\omega_S)]^T$$

The augmented noise matrix is given by:

$$\mathbf{N}_s := \begin{bmatrix} \mathbf{N}_1 \\ \mathbf{N}_2 \end{bmatrix}$$

where  $\mathbf{N}_1, \mathbf{N}_2 \in \mathbb{C}^{M-1 \times T}$  represent matrices formed by selecting the first  $M-1$  rows and last  $M-1$  rows of  $\mathbf{N}$ , respectively. Let  $\widetilde{\mathbf{N}} = \mathbf{W}^H \mathbf{N}_s$ , we have the following bound:

$$\begin{aligned} \|\widetilde{\mathbf{N}}\|_2^2 &\leq \|\mathbf{W}\|_2^2 (\|\mathbf{N}_1\|_2^2 + \|\mathbf{N}_2\|_2^2) \\ &\leq 2\|\mathbf{W}\|_2^2 \|\mathbf{N}\|_2^2 \end{aligned} \quad (49)$$

where the first inequality follows from the fact that  $\|\mathbf{N}_s\|_2^2 \leq \|\mathbf{N}_1\|_2^2 + \|\mathbf{N}_2\|_2^2$ , and the second inequality holds since both  $\mathbf{N}_1, \mathbf{N}_2$  are submatrices of  $\mathbf{N}$ .

For any matrix  $\mathbf{F}$ , we adopt the notation  $\sigma_{\max}(\mathbf{F}) := \|\mathbf{F}\|_2$ , and  $\sigma_{\min}(\mathbf{F}) := 1/\|\mathbf{F}^\dagger\|_2$ . We first use Wedin's theorem [2] to bound  $\|\mathbf{U}_y - \widehat{\mathbf{U}}_y\|_2$ .

**Lemma 1** (Wedin's Theorem [2]). *Consider matrices  $\mathbf{A}, \mathbf{B}, \mathbf{N} \in \mathbb{C}^{M \times N}$  such that*

$$\mathbf{B} = \mathbf{A} + \mathbf{N}$$

*Consider the Singular Value Decompositions of  $\mathbf{A}$  and  $\mathbf{B}$ :*

$$\begin{aligned} \mathbf{A} &= [\mathbf{U}_1 \ \mathbf{U}_0] \begin{bmatrix} \boldsymbol{\Sigma}_1 & \\ & \boldsymbol{\Sigma}_0 \end{bmatrix} \begin{bmatrix} \mathbf{V}_1 \\ \mathbf{V}_0 \end{bmatrix}^H \\ \mathbf{B} &= [\widetilde{\mathbf{U}}_1 \ \widetilde{\mathbf{U}}_0] \begin{bmatrix} \widetilde{\boldsymbol{\Sigma}}_1 & \\ & \widetilde{\boldsymbol{\Sigma}}_0 \end{bmatrix} \begin{bmatrix} \widetilde{\mathbf{V}}_1 \\ \widetilde{\mathbf{V}}_0 \end{bmatrix}^H \end{aligned}$$

where  $\mathbf{U}_1 \in \mathbb{C}^{M \times L}$ ,  $\widetilde{\mathbf{U}}_1 \in \mathbb{C}^{M \times L}$  consist of the  $L$  principal singular vectors of  $\mathbf{A}$  and  $\mathbf{B}$ , respectively. Define  $\mathbf{A}_1 := \mathbf{U}_1 \boldsymbol{\Sigma}_1 \mathbf{V}_1^H$ ,  $\mathbf{A}_0 := \mathbf{U}_0 \boldsymbol{\Sigma}_0 \mathbf{V}_0^H$ ,  $\mathbf{B}_1 := \widetilde{\mathbf{U}}_1 \widetilde{\boldsymbol{\Sigma}}_1 \widetilde{\mathbf{V}}_1^H$ ,

$\mathbf{B}_0 := \widetilde{\mathbf{U}}_0 \widetilde{\boldsymbol{\Sigma}}_0 \widetilde{\mathbf{V}}_0^H$ . If  $\sigma_{\max}(\mathbf{A}_0) \leq \alpha$  and  $\sigma_{\min}(\mathbf{B}_1) \geq \alpha + \delta$  for some  $\alpha \geq 0$  and  $\delta > 0$ , the following holds

$$\|\sin \Theta(\mathcal{R}(\mathbf{A}_1), \mathcal{R}(\mathbf{B}_1))\|_\infty \leq \frac{\max\{\|\mathbf{N}\mathbf{V}_1\|_2, \|\mathbf{N}^H \mathbf{U}_1\|_2\}}{\delta}$$

**Lemma 2.** *Consider the matrices  $\mathbf{A}, \mathbf{B}_1, \mathbf{U}_1, \mathbf{V}_1$  defined in Lemma 1. If  $\text{rank}(\mathbf{A}) = L$ , and  $\|\mathbf{N}\|_2 \leq \sigma_L(\mathbf{A})/2$ , the following holds*

$$\|\sin \Theta(\mathcal{R}(\mathbf{A}), \mathcal{R}(\mathbf{B}_1))\|_\infty \leq \frac{2 \max\{\|\mathbf{N}\mathbf{V}_1\|_2, \|\mathbf{N}^H \mathbf{U}_1\|_2\}}{\sigma_L(\mathbf{A})}$$

*Proof.* Note that since  $\text{rank}(\mathbf{A}) = L$ , we have  $\mathbf{A}_0 = \mathbf{0}$ , and  $\sigma_{\min}(\mathbf{A}) = \sigma_L(\mathbf{A})$ . Using Weyl's theorem [3] for matrix perturbation, we can write

$$\sigma_{\min}(\mathbf{B}_1) \geq \sigma_{\min}(\mathbf{A}) - \|\mathbf{N}\|_2 \geq \frac{\sigma_L(\mathbf{A})}{2}$$

where the last inequality follows from the assumption  $\|\mathbf{N}\|_2 \leq \sigma_L(\mathbf{A})/2$ . The conditions of Lemma 1 are satisfied with  $\alpha = 0$  and  $\delta = \sigma_L(\mathbf{A})$  completing the proof of Lemma 2.  $\square$

We will also be using the following standard result from [4, Pg. 36].

**Lemma 3.** *For any matrices  $\mathbf{A} \in \mathbb{C}^{M \times K}$ , and  $\mathbf{B} \in \mathbb{C}^{K \times T}$ , ( $M > K$ ) where  $\text{rank}(\mathbf{A}) = K$ , we have*

$$\sigma_K(\mathbf{A}\mathbf{B}) \geq \sigma_K(\mathbf{A})\sigma_K(\mathbf{B})$$

**Lemma 4.** *Let  $\widehat{\mathbf{Y}} = \mathbf{B}\mathbf{X} + \widetilde{\mathbf{N}}$ , where  $\text{Rank}(\mathbf{B}\mathbf{X}) = S$ . Consider the Singular Value Decompositions:  $\mathbf{B}\mathbf{X} = \mathbf{U}_y \boldsymbol{\Sigma}_y \mathbf{V}_y^H$ ,  $\widehat{\mathbf{Y}} = [\widehat{\mathbf{U}}_y \ \widehat{\mathbf{U}}_n] \widehat{\boldsymbol{\Sigma}}_y [\widehat{\mathbf{V}}_y^H \ \widehat{\mathbf{V}}_n^H]^H$ , where  $\mathbf{U}_y, \widehat{\mathbf{U}}_y \in \mathbb{C}^{2N \times S}$  consists of the  $S$  principle singular vectors. Assuming that the noise is bounded as  $\|\widetilde{\mathbf{N}}\|_2 \leq \sigma_S(\mathbf{B})\sigma_S(\mathbf{X})/2$ , the following holds*

$$\|\mathbf{U}_y - \widehat{\mathbf{U}}_y\|_2 \leq \frac{2\sqrt{2S}\|\widetilde{\mathbf{N}}\|_2}{\sigma_S(\mathbf{B})\sigma_S(\mathbf{X})} \quad (50)$$

*Proof.* When the noise  $\widetilde{\mathbf{N}}$  is bounded by  $\|\widetilde{\mathbf{N}}\|_2 \leq \sigma_S(\mathbf{B})\sigma_S(\mathbf{X})/2 \leq \sigma_S(\mathbf{B}\mathbf{X})/2$ , the assumptions of Lemma 2 are satisfied for  $L = S$ , which implies

$$\begin{aligned} \|\sin \Theta(\mathbf{U}_y, \widehat{\mathbf{U}}_y)\|_\infty &\leq \frac{2 \max\{\|\widetilde{\mathbf{N}}\mathbf{V}_y\|_2, \|\widetilde{\mathbf{N}}^H \mathbf{U}_y\|_2\}}{\sigma_S(\mathbf{B}\mathbf{X})} \\ &\leq \frac{2 \max\{\|\widetilde{\mathbf{N}}\mathbf{V}_y\|_2, \|\widetilde{\mathbf{N}}^H \mathbf{U}_y\|_2\}}{\sigma_S(\mathbf{B})\sigma_S(\mathbf{X})} \end{aligned}$$

Using the fact  $\|\mathbf{V}_y\|_2 = 1$ ,  $\|\mathbf{U}_y\|_2 = 1$ , we have

$$\|\sin \Theta(\mathbf{U}_y, \widehat{\mathbf{U}}_y)\|_\infty \leq \frac{2\|\widetilde{\mathbf{N}}\|_2}{\sigma_S(\mathbf{B})\sigma_S(\mathbf{X})} \quad (51)$$

Now, under the canonical basis assumption, we have  $\|\sin \Theta(\mathbf{U}_y, \widehat{\mathbf{U}}_y)\|_\infty = \sin(\omega_1)$  and for  $i = 1, 2, \dots, S$

$$\|\widehat{\mathbf{u}}_i - \mathbf{u}_i\|_2^2 = 2(1 - \cos \omega_k) \leq 2(1 - \cos^2 \omega_k) \leq 2 \sin^2 \omega_k$$

Therefore,

$$\begin{aligned} \|\mathbf{U}_y - \widehat{\mathbf{U}}_y\|_2 &\leq \|\mathbf{U}_y - \widehat{\mathbf{U}}_y\|_F = \left( \sum_{i=1}^S \|\widehat{\mathbf{u}}_i - \mathbf{u}_i\|_2^2 \right)^{1/2} \\ &\leq (2S \sin^2 \omega_1)^{1/2} = \sqrt{2S} \sin \omega_1 \end{aligned} \quad (52)$$

The proof is completed by combining (52) and (51).  $\square$

**Lemma 5.** Consider the measurement model in (14). If  $\text{rank}(\mathbf{B}\mathbf{X}) = S$ , and  $\|\mathbf{U}_y - \widehat{\mathbf{U}}_y\|_2 \leq \sigma_S(\mathbf{U}_1)/2$ , then

$$\|\Psi - \widehat{\Psi}\|_2 \leq \frac{7\|\mathbf{U}_y - \widehat{\mathbf{U}}_y\|_2}{\sigma_S(\mathbf{U}_1)^2} \quad (53)$$

*Proof.* Notice that

$$\begin{aligned} \|\Psi - \widehat{\Psi}\|_2 &= \|(\widehat{\mathbf{U}}_1^\dagger - \mathbf{U}_1^\dagger)\widehat{\mathbf{U}}_2 + \mathbf{U}_1^\dagger(\widehat{\mathbf{U}}_2 - \mathbf{U}_2)\|_2 \\ &\leq \|(\widehat{\mathbf{U}}_1^\dagger - \mathbf{U}_1^\dagger)\|_2\|\widehat{\mathbf{U}}_2\|_2 + \|\mathbf{U}_1^\dagger\|_2\|(\widehat{\mathbf{U}}_2 - \mathbf{U}_2)\|_2 \\ &\leq \|(\widehat{\mathbf{U}}_1^\dagger - \mathbf{U}_1^\dagger)\|_2 + \|\mathbf{U}_1^\dagger\|_2\|(\widehat{\mathbf{U}}_y - \mathbf{U}_y)\|_2 \end{aligned}$$

where the last inequality follows from the fact that  $\widehat{\mathbf{U}}_2, \widehat{\mathbf{U}}_2 - \mathbf{U}_2$  are submatrices of  $\widehat{\mathbf{U}}_y$  and  $\widehat{\mathbf{U}}_y - \mathbf{U}_y$ , respectively. Therefore, we have  $\|\widehat{\mathbf{U}}_2\|_2 \leq \|\widehat{\mathbf{U}}_y\|_2 = 1$ , and  $\|\widehat{\mathbf{U}}_2 - \mathbf{U}_2\|_2 \leq \|\widehat{\mathbf{U}}_y - \mathbf{U}_y\|_2$ . By the assumption in this lemma, we have,

$$\|\widehat{\mathbf{U}}_1 - \mathbf{U}_1\|_2 \leq \|\widehat{\mathbf{U}}_y - \mathbf{U}_y\|_2 \leq \frac{\sigma_S(\mathbf{U}_1)}{2} \quad (54)$$

We use a result from [5, Theorem 3.2] which states that a matrix  $\mathbf{F}$  with rank  $S$ , and its perturbed matrix  $\widetilde{\mathbf{F}} = \mathbf{F} + \mathbf{E}$  satisfy the following inequality:

$$\|\mathbf{F}^\dagger - \widetilde{\mathbf{F}}^\dagger\|_2 \leq \frac{3\|\mathbf{E}\|_2}{\sigma_S(\mathbf{F})(\sigma_S(\mathbf{F}) - \|\mathbf{E}\|_2)}$$

provided the perturbation satisfies  $\|\mathbf{E}\|_2 < \sigma_S(\mathbf{F})$ . We use this result by substituting  $\mathbf{F}$  with  $\mathbf{U}$ , and  $\widetilde{\mathbf{F}}$  with  $\widehat{\mathbf{U}}_1$ .

From (54), the perturbation condition is satisfied and this result leads to:

$$\begin{aligned} \|\widehat{\mathbf{U}}_1^\dagger - \mathbf{U}_1^\dagger\|_2 &\leq \frac{3\|\widehat{\mathbf{U}}_1 - \mathbf{U}_1\|_2}{\sigma_S(\mathbf{U}_1)(\sigma_S(\mathbf{U}_1) - \|\widehat{\mathbf{U}}_1 - \mathbf{U}_1\|_2)} \\ &\leq \frac{6\|\widehat{\mathbf{U}}_y - \mathbf{U}_y\|_2}{\sigma_S(\mathbf{U}_1)^2} \end{aligned} \quad (55)$$

Therefore, we have that

$$\begin{aligned} \|\Psi - \widehat{\Psi}\|_2 &\leq \left( \frac{6}{\sigma_S(\mathbf{U}_1)^2} + \frac{1}{\sigma_S(\mathbf{U}_1)} \right) \|\widehat{\mathbf{U}}_y - \mathbf{U}_y\|_2 \\ &\leq \frac{7\|\widehat{\mathbf{U}}_y - \mathbf{U}_y\|_2}{\sigma_S(\mathbf{U}_1)^2} \end{aligned} \quad (56)$$

$\square$

**Lemma 6.** Consider the measurement model in (14) such that (17) holds. Then the following bound is satisfied:

$$\|\Psi - \widehat{\Psi}\|_2 \leq \frac{14\sqrt{2S}\|\widetilde{\mathbf{N}}\|_2}{\sigma_S(\mathbf{B})\sigma_S(\mathbf{X})\sigma_S(\mathbf{U}_1)^2} \quad (57)$$

*Proof.* From (17) and (49), we have

$$\|\widetilde{\mathbf{N}}\|_2 \leq \frac{\sigma_S(\mathbf{B})\sigma_S(\mathbf{X})\sigma_S(\mathbf{U}_1)}{8\sqrt{2S}} \leq \frac{\sigma_S(\mathbf{B})\sigma_S(\mathbf{X})}{2} \quad (58)$$

where the second inequality follows from the fact that  $\sigma_S(\mathbf{U}_1) \leq 1$  and  $S \geq 1$ . By applying Lemma 4, (50) holds. Now, (50) and (58) together imply that  $\|\mathbf{U}_y - \widehat{\mathbf{U}}_y\|_2 \leq \sigma_S(\mathbf{U}_1)/2$ . This ensures that the conditions of Lemma 5 are satisfied. Combining (53) and (50) leads to the desired result.  $\square$

**Lemma 7.**

$$md(\mathcal{F}, \widehat{\mathcal{F}}) \leq \frac{1}{2}md(\Psi, \widehat{\Psi}) \quad (59)$$

*Proof.* The proof follows directly from eq. (III.1) in [1]  $\square$

**Lemma 8.** Consider the measurement model in (14). If  $\text{rank}(\mathbf{B}\mathbf{X}) = S$ , then

$$md(\mathcal{F}, \widehat{\mathcal{F}}) \leq \frac{S\|\mathbf{B}\|_2}{\sigma_S(\mathbf{B})}\|\Psi - \widehat{\Psi}\|_2 \quad (60)$$

*Proof.* Based on (9),  $\Psi$  is diagonalizable by the invertible matrix  $\mathbf{P}$ . Using Bauer-Fike theorem, [6], [4, Theorem 3.3] and Lemma 7, we have

$$md(\mathcal{F}, \widehat{\mathcal{F}}) \leq \frac{1}{2}(2S - 1)\kappa(\mathbf{P}^{-1})\|\Psi - \widehat{\Psi}\|_2 \quad (61)$$

where  $\kappa(\mathbf{P}^{-1}) = \|\mathbf{P}\|_2\|\mathbf{P}^{-1}\|_2$ . To bound  $\kappa(\mathbf{P}^{-1})$ , we use the fact that  $\mathbf{U}_y = \mathbf{B}\mathbf{P}$  and  $\|\mathbf{U}_y\|_2 = 1$ . This implies that

$$\kappa(\mathbf{P}^{-1}) \leq \kappa(\mathbf{B}) = \frac{\|\mathbf{B}\|_2}{\sigma_S(\mathbf{B})} \quad (62)$$

$\square$

## REFERENCES

- [1] W. Li, W. Liao, and A. Fannjiang, "Super-resolution limit of the esprit algorithm," *IEEE Transactions on Information Theory*, vol. 66, no. 7, pp. 4593–4608, 2020.
- [2] P.-A. Wedin, "Perturbation bounds in connection with singular value decomposition," *BIT Numerical Mathematics*, vol. 12, no. 1, pp. 99–111, 1972.
- [3] J. N. Franklin, *Matrix theory*. Courier Corporation, 2012.
- [4] G. W. Stewart, "Matrix perturbation theory," 1990.
- [5] P. C. Hansen, "The truncatedsvd as a method for regularization," *BIT Numerical Mathematics*, vol. 27, no. 4, pp. 534–553, 1987.
- [6] F. L. Bauer and C. T. Fike, "Norms and exclusion theorems," *Numerische Mathematik*, vol. 2, no. 1, pp. 137–141, 1960.
